# Supplementary material
Source: PubMed Central journal article supplement (PMC509190)

### CSTX-13 chain A

4342.80 Da

$[M+6H]^{6+}$

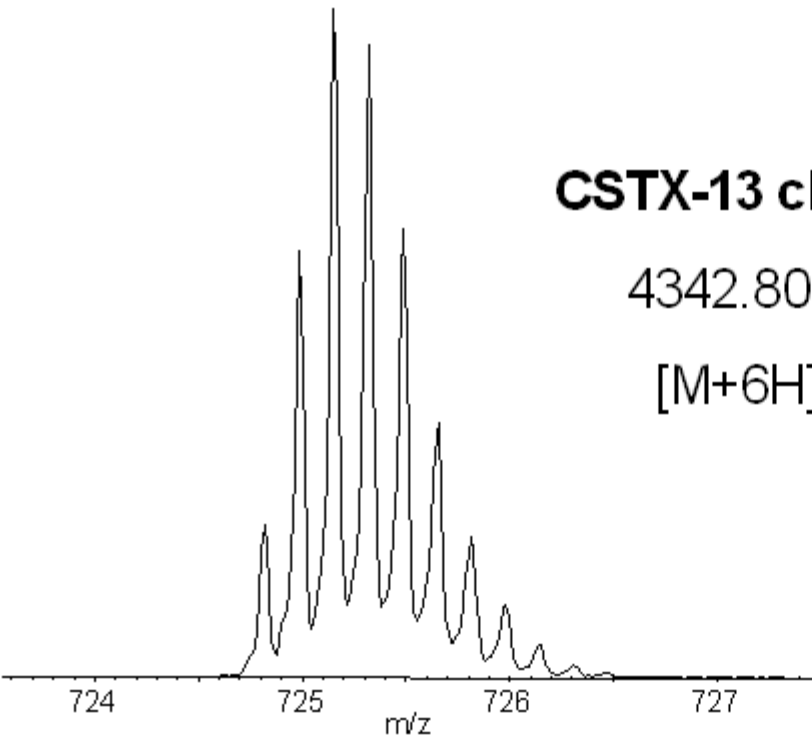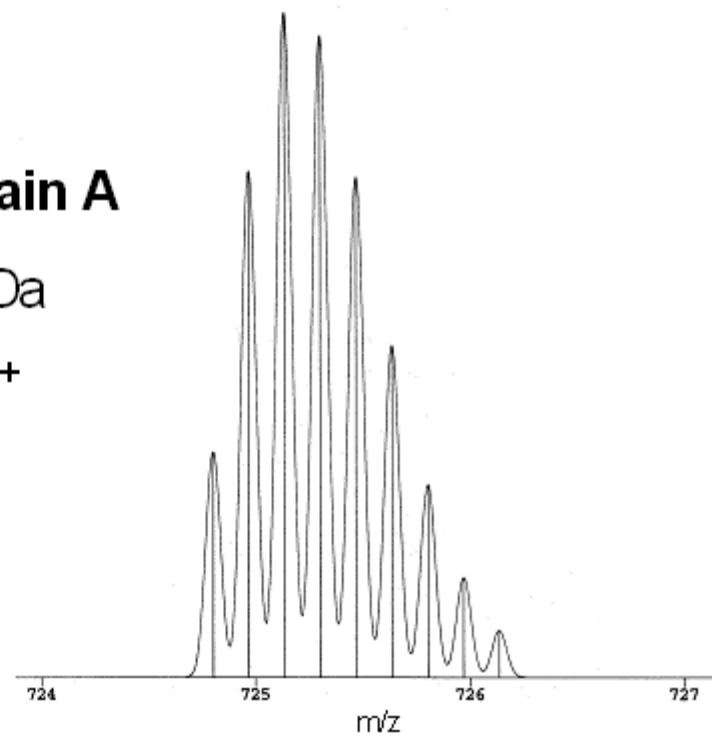

### CSTX-13 native

7354.51 Da

$[M+7H]^{7+}$

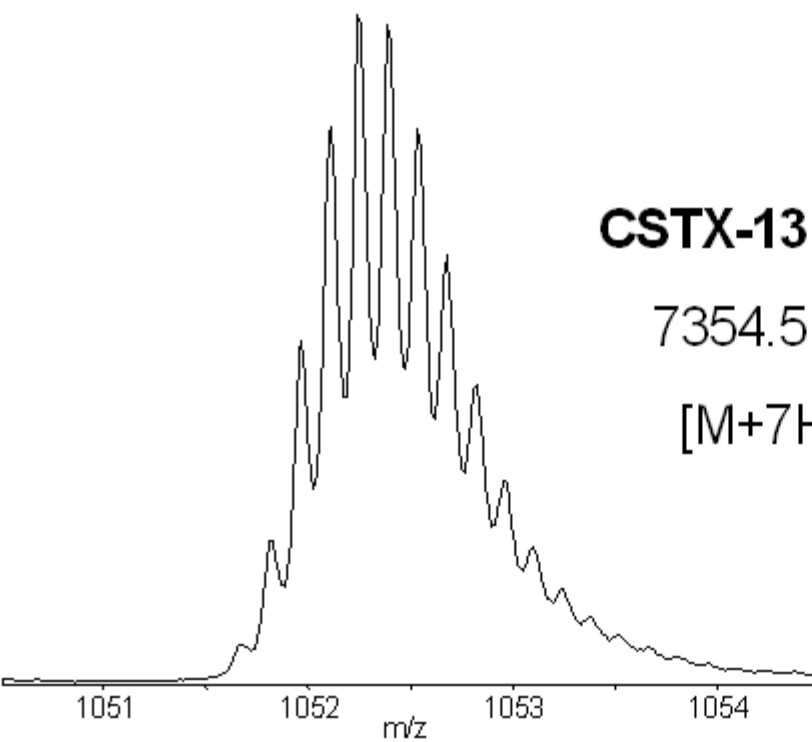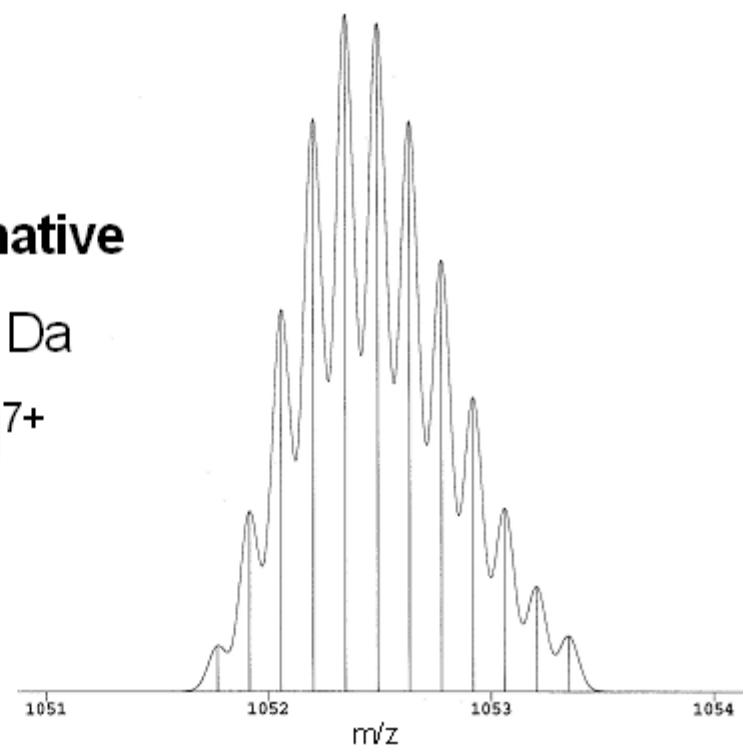

Supplement: pnas_101_31_11251__1.pdf [file pnas_101_31_11251__1.pdf]

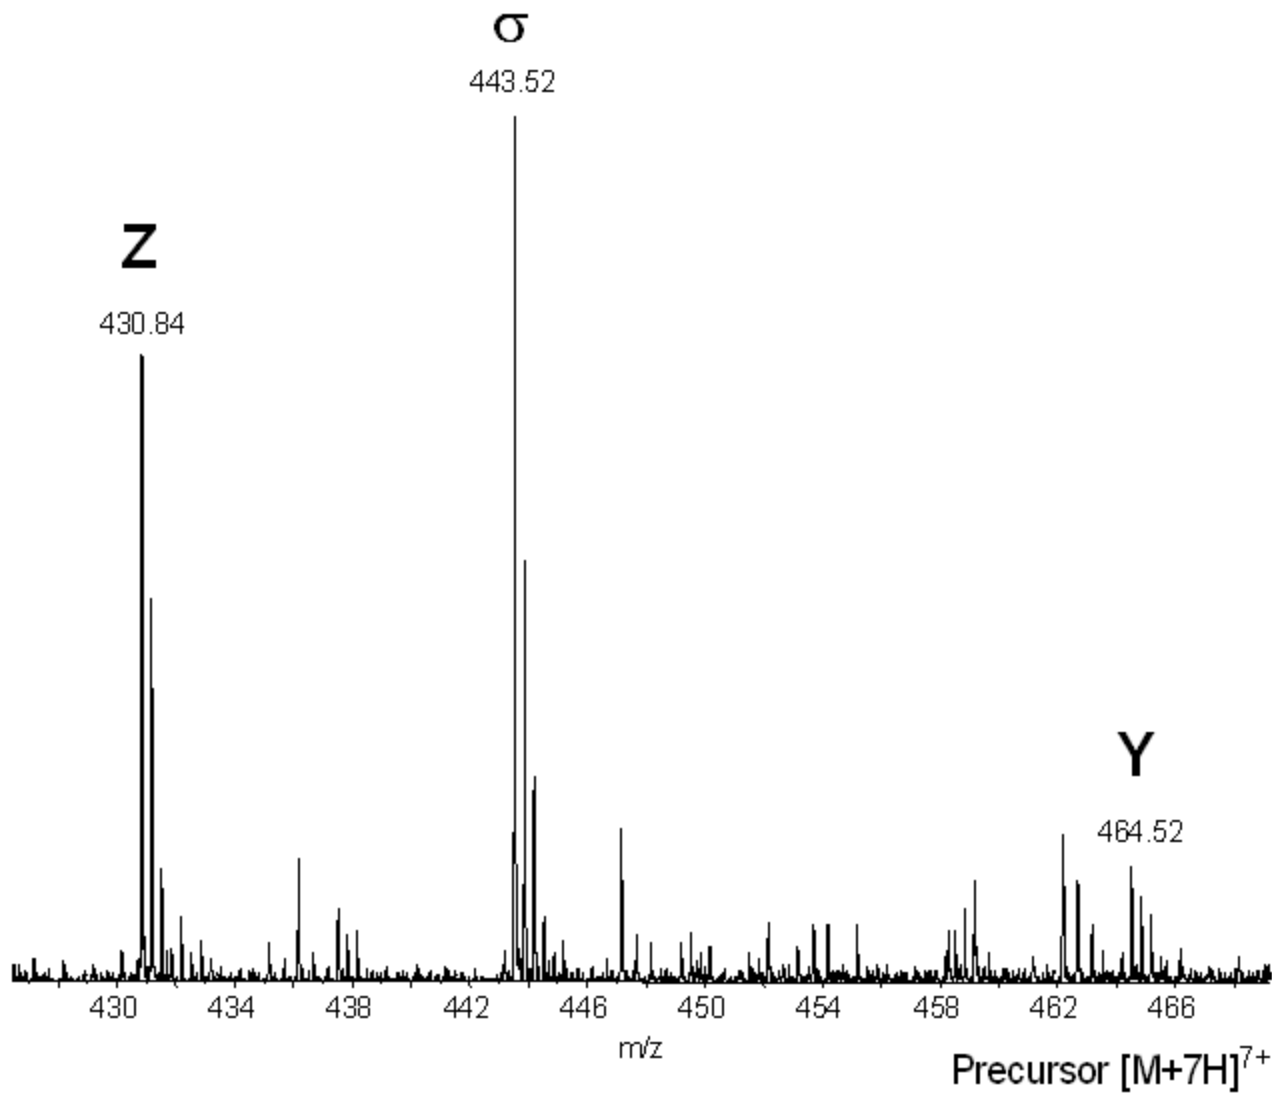

Supplement: pnas_101_31_11251__2.pdf [file pnas_101_31_11251__2.pdf]
